# Supplementary material for: An injectable magnesium-loaded hydrogel releases hydrogen to promote osteoporotic bone repair via ROS scavenging and immunomodulation
Source: PubMed Central journal article supplement (PMC11209720; doi:10.7150/thno.97412), 2024-06-17
Supplement: thnov14p3739s1.pdf [file thnov14p3739s1.pdf]

## Supporting Information

### **An injectable magnesium-loaded hydrogel releases hydrogen to promote osteoporotic bone repair via ROS scavenging and immunomodulation**

Hang Zhou<sup>1,4</sup>, Zhongyuan He<sup>1</sup>, Youde Cao<sup>2</sup>, Lei Chu<sup>1</sup>, Bing Liang<sup>2,#</sup>, Kexiao Yu<sup>3,#</sup>, Zhongliang Deng<sup>1,#</sup>

<sup>1</sup> Department of Orthopaedics, the Second Affiliated Hospital of Chongqing Medical University, 76 Linjiang Road, Yuzhong District, Chongqing, 400010, P. R. China.

<sup>2</sup> Department of Pathology from College of Basic Medicine, and Molecular Medicine Diagnostic & Testing Center, and Department of Clinical Pathology Laboratory of Pathology Diagnostic Center, Chongqing Medical University, 1 Yixueyuan Road, Yuzhong District, Chongqing 400016, P. R. China.

<sup>3</sup> Department of Orthopedics, Chongqing Traditional Chinese Medicine Hospital, The First Affiliated Hospital of Chongqing College of Traditional Chinese Medicine, No. 6 Panxi Seventh Branch Road, Jiangbei District, Chongqing 400021, P. R. China.

<sup>4</sup> Department of Ultrasound & Chongqing Key Laboratory of Ultrasound Molecular Imaging, the Second Affiliated Hospital of Chongqing Medical University, Chongqing 400010, P. R. China.

# Corresponding authors: doctorliang51@163.com (B. Liang), csyxk@126.com (K. Yu), dengzl@cqmu.edu.cn (Z. Deng)

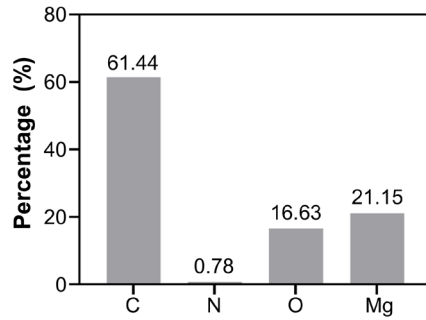

**Figure S1.** Elemental percentages of the Mg@PEG microparticles.

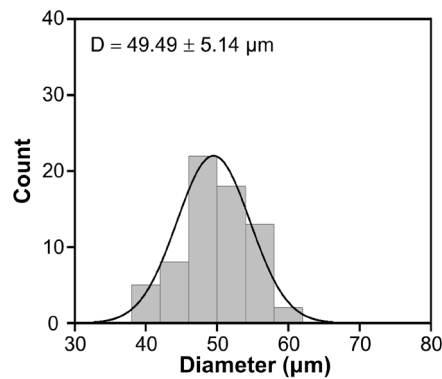

**Figure S2.** The size distribution of Mg particles.

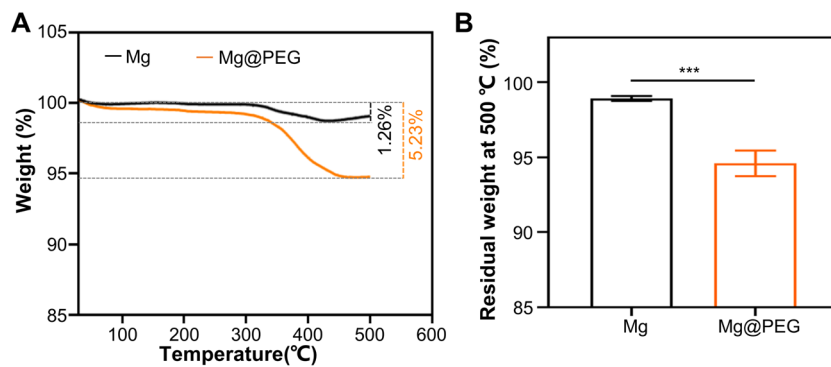

**Figure S3.** Thermogravimetric analysis of Mg and Mg@PEG particles. \*\*\* $p < 0.001$

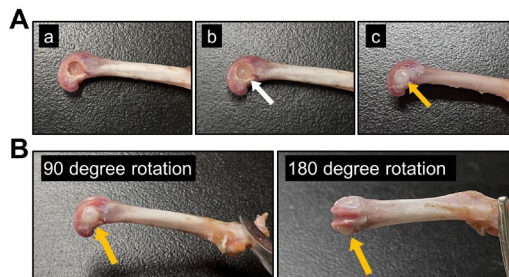

**Figure S4.** The ability of the Mg@PEG-PLGA hydrogel to bind to bone defect sites. (A) Twenty microliters of the Mg@PEG-PLGA hydrogel (white arrow) was injected to completely fill the rat femoral condylar defect, and the hydrogel solidified after 5 min of irrigation with 0.9% saline (yellow

arrow). (B) No displacement or deformation of the solidified Mg@PEG-PLGA hydrogel (yellow arrow) was observed during the rotation test.

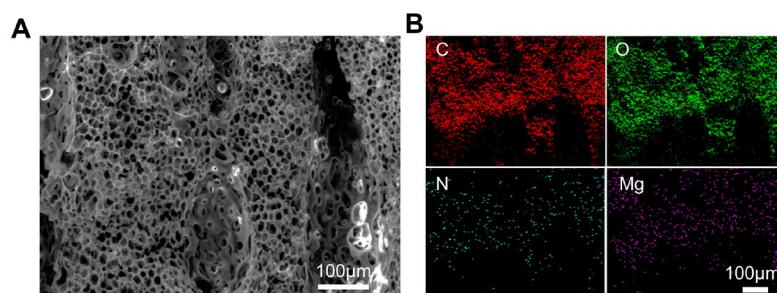

**Figure S5.** (A) SEM images and corresponding (B) element mapping images of the solidified Mg@PEG-PLGA gel.

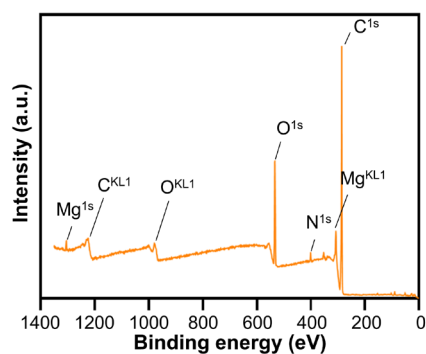

**Figure S6.** XPS spectra of the solidified Mg@PEG-PLGA gel.

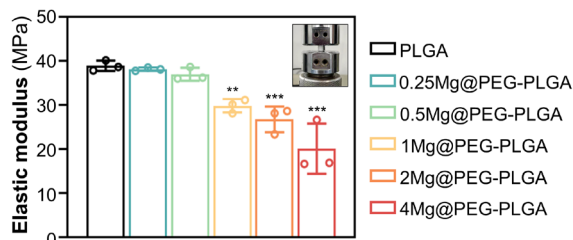

**Figure S7.** The elastic modulus of the solidified PLGA and Mg@PEG-PLGA gels (loaded with different Mg contents). Insert figure shows the mechanical test of the solidified hydrogel.  $**p < 0.01$  and  $***p < 0.001$

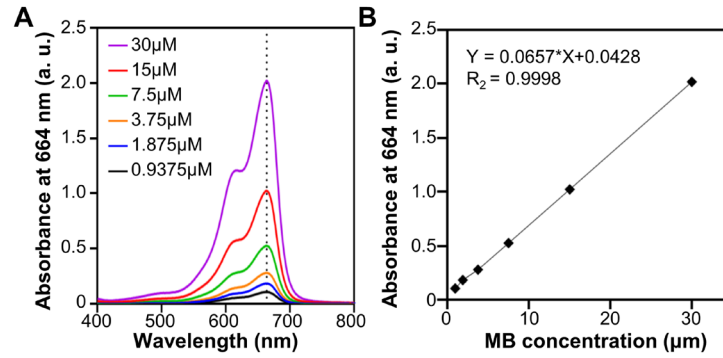

**Figure S8.** (A) Absorption spectra of MB at different concentrations; (B) the standard curve of absorbance vs MB concentration.

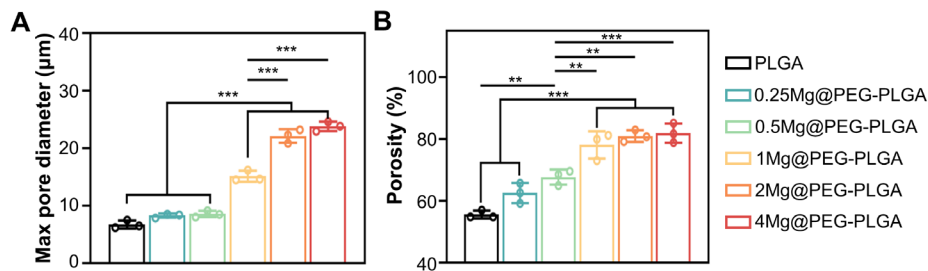

**Figure S9.** The (A) max pore diameter analysis of the solidified PLGA and Mg@PEG-PLGA gels measured by ImageJ. (B) Porosity test of the solidified PLGA and Mg@PEG-PLGA gels. \*\* $p < 0.01$  and \*\*\* $p < 0.001$

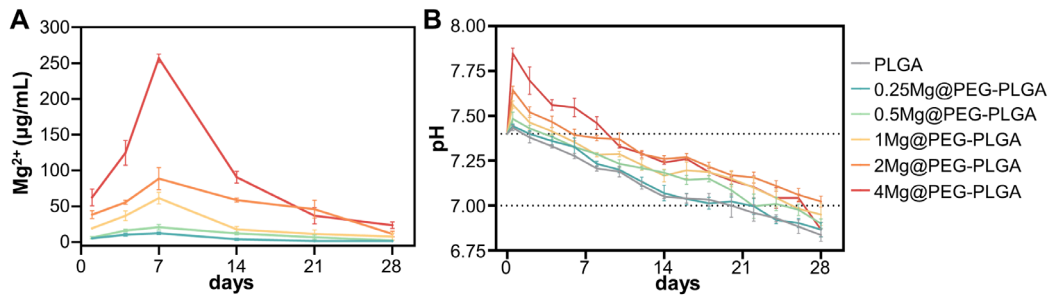

**Figure S10.** Degradation studies of PLGA and Mg@PEG-PLGA hydrogels. (A) The Mg<sup>2+</sup> ions release behavior of different Mg@PEG-PLGA hydrogels. (B) Changes in the pH of PBS solution with immersed PLGA or Mg@PEG-PLGA hydrogels.

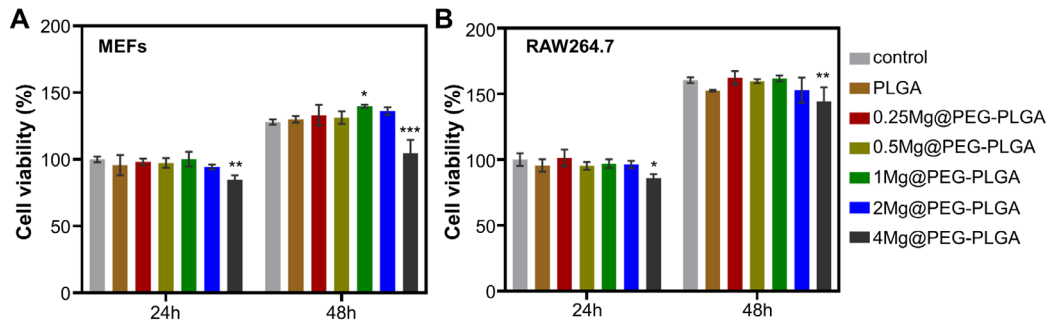

**Figure S11.** CCK-8 assay of the (A) MEFs and (B) Raw264.7 cells cultured with or without hydrogels. \* $p < 0.05$ , \*\* $p < 0.01$  and \*\*\* $p < 0.001$ , compared with the control group.

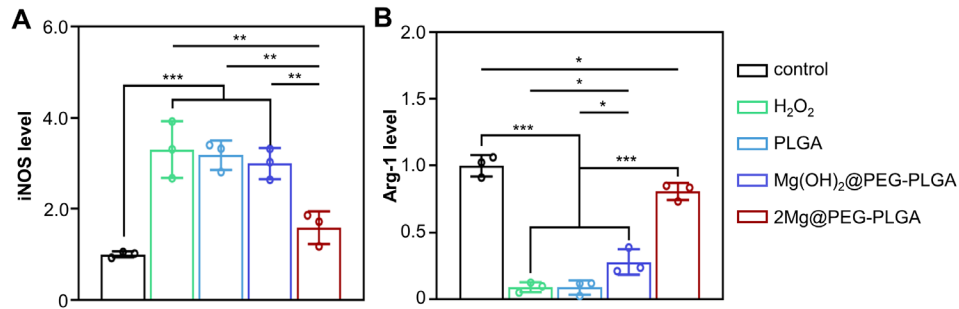

**Figure S12.** The relative fluorescence intensity quantification of iNOS and Arg-1. \* $p < 0.05$ , \*\* $p < 0.01$  and \*\*\* $p < 0.001$

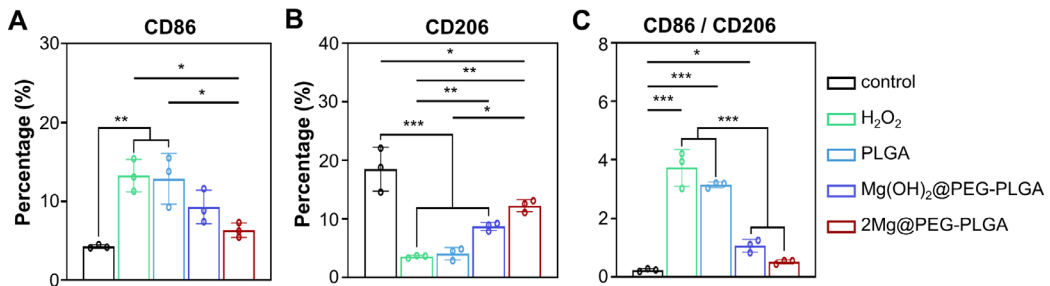

**Figure S13.** Quantification of the percentages of (A) CD86<sup>+</sup> and (B) CD206<sup>+</sup> macrophages and (C) the ratio of M1/M2 (CD86<sup>+</sup>/CD206<sup>+</sup>) macrophages. \* $p < 0.05$ , \*\* $p < 0.01$  and \*\*\* $p < 0.001$

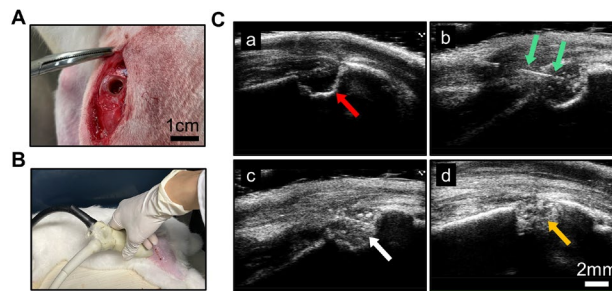

**Figure S14.** Ultrasound-guided minimally invasive implantation of the Mg@PEG-PLGA hydrogel. (A) A rabbit model of femoral condylar defects (5 mm in diameter, 3 mm in depth) was established.

(B) An ultrasound machine was used for the local percutaneous injection of the Mg@PEG-PLGA hydrogel into the femoral condylar defect. (C) After locating the femoral condylar defect (red arrow), a needle (16 G) (green arrow) was slowly inserted into the defect site under continuous ultrasound guidance. Approximately 25  $\mu$ L of the Mg@PEG-PLGA hydrogel (white arrow) was injected to completely fill the bone defect. Following a 5-minute local infusion of 0.9% saline, a bone defect filled with solidified Mg@PEG-PLGA hydrogel (yellow arrow) was observed.

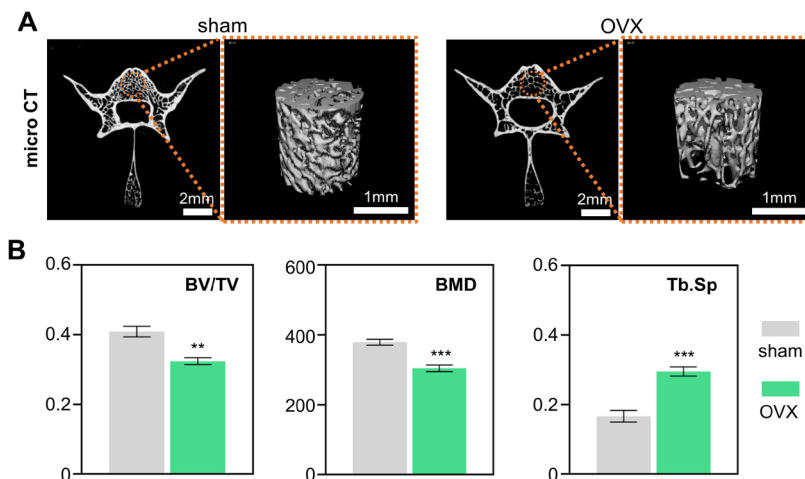

**Figure S15.** (A) The micro CT image of vertebral body and corresponding (B) quantitative analysis: (a) ratio of bone volume/total volume (BV/TV), (b) bone mineral density (BMD), and (c) trabecular separation (Tb.Sp).

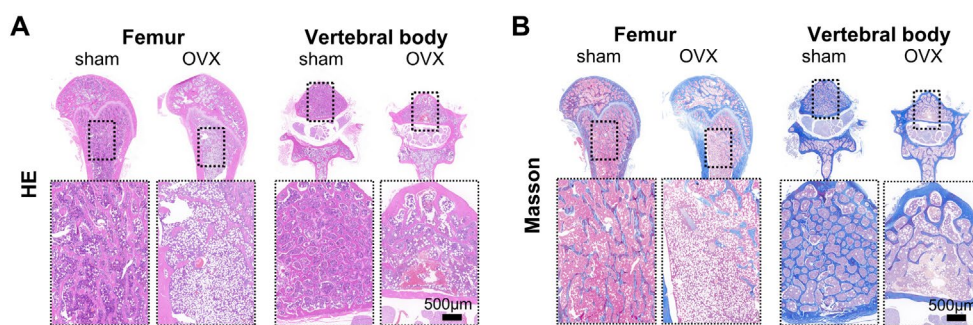

**Figure S16.** HE and Masson staining of the femurs and vertebral bodies in the sham and OVX groups.

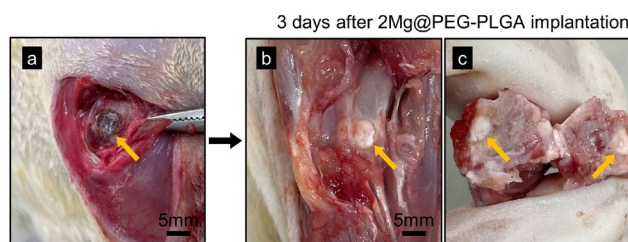

**Figure S17.** There was no observable material leakage into the surrounding tissue 3 days after

Mg@PEG-PLGA *in vivo* implantation.

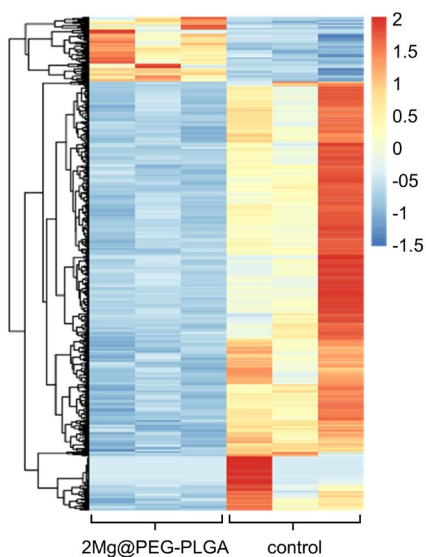

**Figure S18.** Heatmap representing the top 100 genes significantly differentially expressed between the 2Mg@PEG-PLGA group and the control group.

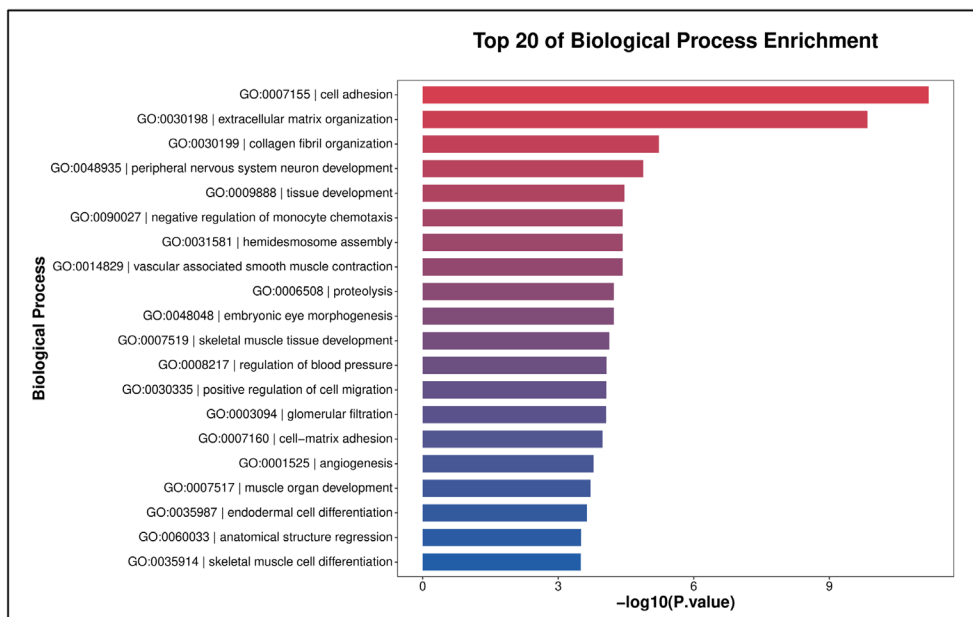

**Figure S19.** Functional enrichment analysis of the differentially expressed genes in 2Mg@PEG-PLGA gel treated rats as compared to the control group.



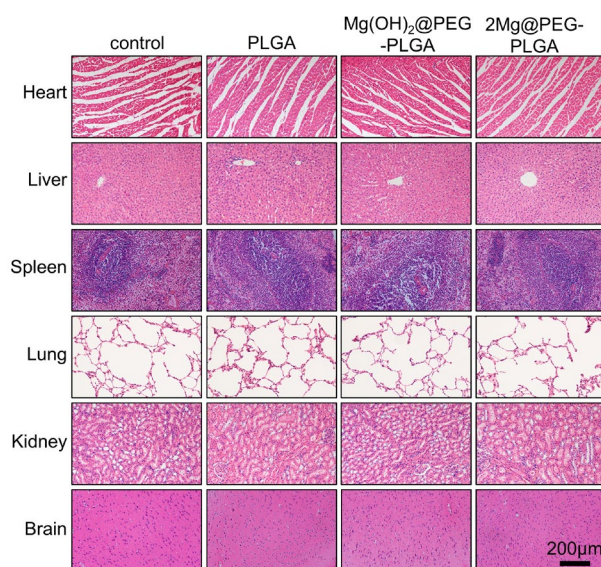

**Figure S20.** HE staining images of major organs of the rats in different groups.

### Supporting table

**Table S1.** Serological analysis of the experimental rats.

|                               | Reference ranges | Control (4W)   | 2Mg@PEG-PLGA (4W) | Control (8W)   | 2Mg@PEG-PLGA (8W) |
|-------------------------------|------------------|----------------|-------------------|----------------|-------------------|
| <b>ALT</b> U/L                | 73.69 ± 24.12    | 72.26 ± 14.28  | 80.65 ± 6.39      | 81.60 ± 10.20  | 78.65 ± 9.51      |
| <b>AST</b> U/L                | 173.32 ± 43.75   | 150.21 ± 18.95 | 169.64 ± 23.21    | 170.21 ± 30.27 | 162.71 ± 10.84    |
| <b>BUN</b> mg/dl              | 20.33 ± 3.99     | 21.02 ± 0.95   | 19.84 ± 1.02      | 19.96 ± 2.01   | 21.65 ± 0.82      |
| <b>CREA</b> µmol/L            | 47.25 ± 16.51    | 43.54 ± 4.54   | 45.84 ± 9.21      | 48.37 ± 8.54   | 45.89 ± 6.02      |
| <b>Mg<sup>2+</sup></b> mmol/L | 0.67-1.85        | 1.15 ± 0.21    | 1.28 ± 0.20       | 0.95 ± 0.18    | 1.24 ± 0.36       |
